# Supplementary material for: Characterization of C–H⋯π interactions in the structure of the CHClF2–HCCH weakly bound complex
Source: Royal Society of Chemistry journal article supplement (doi:10.1039/c0cp00924e), 2010-01-01
Supplement: c0cp00924e.pdf [file c0cp00924e.pdf]

**Observed Transition Frequencies for CH<sup>35</sup>ClF<sub>2</sub>-H<sup>12</sup>C<sup>12</sup>CH**

| <u>J'</u> | <u>K<sub>a</sub>'</u> | <u>K<sub>c</sub>'</u> | <u>F' + 1/2</u> | <u>J''</u> | <u>K<sub>a</sub>''</u> | <u>K<sub>c</sub>''</u> | <u>F'' + 1/2</u> | <u>Frequency (MHz)</u> | <u>Obs. - Calc. (MHz)</u> |
|-----------|-----------------------|-----------------------|-----------------|------------|------------------------|------------------------|------------------|------------------------|---------------------------|
| 2         | 0                     | 2                     | 3               | 1          | 0                      | 1                      | 2                | 4997.9879              | 0.0015                    |
| 2         | 0                     | 2                     | 4               | 1          | 0                      | 1                      | 3                | 4999.2977              | 0.0019                    |
| 2         | 1                     | 1                     | 4               | 1          | 1                      | 0                      | 3                | 5210.5939              | 0.0026                    |
| 2         | 1                     | 1                     | 3               | 1          | 1                      | 0                      | 2                | 5219.2850              | 0.0011                    |
| 3         | 1                     | 3                     | 4               | 2          | 1                      | 2                      | 4                | 7205.4268              | -0.0007                   |
| 3         | 1                     | 3                     | 2               | 2          | 1                      | 2                      | 1                | 7209.3602              | -0.0029                   |
| 3         | 1                     | 3                     | 3               | 2          | 1                      | 2                      | 2                | 7211.1401              | 0.0007                    |
| 3         | 1                     | 3                     | 5               | 2          | 1                      | 2                      | 4                | 7212.3808              | -0.0004                   |
| 3         | 1                     | 3                     | 4               | 2          | 1                      | 2                      | 3                | 7214.1538              | 0.0014                    |
| 3         | 1                     | 3                     | 3               | 2          | 1                      | 2                      | 3                | 7217.4130              | 0.0012                    |
| 3         | 1                     | 3                     | 2               | 2          | 1                      | 2                      | 2                | 7218.1322              | -0.0002                   |
| 3         | 0                     | 3                     | 3               | 2          | 0                      | 2                      | 3                | 7459.2182              | 0.0005                    |
| 3         | 0                     | 3                     | 4               | 2          | 0                      | 2                      | 3                | 7461.7282              | 0.0007                    |
| 3         | 0                     | 3                     | 5               | 2          | 0                      | 2                      | 4                | 7463.6775              | -0.0009                   |
| 3         | 0                     | 3                     | 3               | 2          | 0                      | 2                      | 2                | 7464.4535              | -0.0035                   |
| 3         | 0                     | 3                     | 2               | 2          | 0                      | 2                      | 1                | 7466.3212              | -0.0048                   |
| 3         | 2                     | 2                     | 3               | 2          | 2                      | 1                      | 2                | 7519.9682              | 0.0026                    |
| 3         | 2                     | 2                     | 4               | 2          | 2                      | 1                      | 3                | 7526.2641              | -0.0024                   |
| 3         | 2                     | 1                     | 2               | 2          | 2                      | 0                      | 1                | 7568.0472              | -0.0044                   |
| 3         | 2                     | 1                     | 5               | 2          | 2                      | 0                      | 4                | 7574.8125              | -0.0022                   |
| 3         | 2                     | 1                     | 3               | 2          | 2                      | 0                      | 2                | 7578.6275              | 0.0007                    |
| 3         | 2                     | 1                     | 3               | 2          | 2                      | 0                      | 3                | 7583.8725              | -0.0086                   |
| 3         | 2                     | 1                     | 4               | 2          | 2                      | 0                      | 3                | 7585.3959              | -0.0025                   |
| 3         | 1                     | 2                     | 5               | 2          | 1                      | 1                      | 4                | 7809.6820              | 0.0023                    |
| 3         | 1                     | 2                     | 4               | 2          | 1                      | 1                      | 3                | 7811.4185              | 0.0033                    |
| 3         | 1                     | 2                     | 2               | 2          | 1                      | 1                      | 1                | 7813.1812              | 0.0016                    |
| 3         | 1                     | 2                     | 3               | 2          | 1                      | 1                      | 2                | 7814.9246              | -0.0028                   |
| 3         | 1                     | 2                     | 4               | 2          | 1                      | 1                      | 4                | 7828.8471              | -0.0030                   |
| 4         | 1                     | 4                     | 3               | 3          | 1                      | 3                      | 2                | 9600.1493              | 0.0004                    |
| 4         | 1                     | 4                     | 4               | 3          | 1                      | 3                      | 3                | 9600.4699              | 0.0002                    |
| 4         | 1                     | 4                     | 6               | 3          | 1                      | 3                      | 5                | 9601.0831              | 0.0001                    |
| 4         | 1                     | 4                     | 5               | 3          | 1                      | 3                      | 4                | 9601.3918              | 0.0013                    |
| 4         | 1                     | 4                     | 4               | 3          | 1                      | 3                      | 4                | 9603.7254              | -0.0037                   |
| 4         | 1                     | 4                     | 3               | 3          | 1                      | 3                      | 3                | 9607.1415              | -0.0004                   |
| 4         | 0                     | 4                     | 3               | 3          | 0                      | 3                      | 3                | 9883.3952              | 0.0004                    |
| 4         | 0                     | 4                     | 4               | 3          | 0                      | 3                      | 4                | 9883.9154              | -0.0010                   |
| 4         | 0                     | 4                     | 5               | 3          | 0                      | 3                      | 4                | 9885.0028              | 0.0024                    |
| 4         | 0                     | 4                     | 4               | 3          | 0                      | 3                      | 3                | 9886.4276              | 0.0015                    |
| 4         | 0                     | 4                     | 6               | 3          | 0                      | 3                      | 5                | 9887.3220              | 0.0058                    |
| 4         | 0                     | 4                     | 3               | 3          | 0                      | 3                      | 2                | 9888.9256              | 0.0052                    |
| 4         | 0                     | 4                     | 5               | 3          | 0                      | 3                      | 5                | 9890.4154              | 0.0046                    |
| 4         | 2                     | 3                     | 3               | 3          | 2                      | 2                      | 2                | 10012.8784             | -0.0037                   |
| 4         | 2                     | 3                     | 6               | 3          | 2                      | 2                      | 5                | 10014.0231             | 0.0008                    |
| 4         | 2                     | 3                     | 4               | 3          | 2                      | 2                      | 3                | 10016.0911             | 0.0070                    |
| 4         | 2                     | 3                     | 5               | 3          | 2                      | 2                      | 4                | 10017.1634             | -0.0033                   |
| 4         | 3                     | 2                     | 3               | 3          | 3                      | 1                      | 2                | 10045.1096             | 0.0068                    |
| 4         | 3                     | 1                     | 4               | 3          | 3                      | 0                      | 3                | 10057.4331             | 0.0002                    |
| 4         | 2                     | 2                     | 3               | 3          | 2                      | 1                      | 3                | 10149.7273             | -0.0036                   |
| 4         | 2                     | 2                     | 3               | 3          | 2                      | 1                      | 2                | 10152.9073             | -0.0023                   |

|   |   |   |   |   |   |   |   |            |         |
|---|---|---|---|---|---|---|---|------------|---------|
| 4 | 2 | 2 | 6 | 3 | 2 | 1 | 5 | 10154.5648 | -0.0031 |
| 4 | 2 | 2 | 4 | 3 | 2 | 1 | 4 | 10156.9961 | 0.0066  |
| 4 | 2 | 2 | 4 | 3 | 2 | 1 | 3 | 10158.5140 | 0.0073  |
| 4 | 2 | 2 | 5 | 3 | 2 | 1 | 4 | 10160.0495 | 0.0006  |
| 4 | 2 | 2 | 5 | 3 | 2 | 1 | 5 | 10163.2849 | -0.0013 |
| 4 | 1 | 3 | 3 | 3 | 1 | 2 | 3 | 10378.2139 | -0.0045 |
| 4 | 1 | 3 | 6 | 3 | 1 | 2 | 5 | 10395.1987 | -0.0021 |
| 4 | 1 | 3 | 5 | 3 | 1 | 2 | 4 | 10395.3731 | 0.0046  |
| 4 | 1 | 3 | 5 | 3 | 1 | 2 | 5 | 10414.5313 | -0.0076 |
| 5 | 1 | 5 | 5 | 4 | 1 | 4 | 4 | 11977.3716 | 0.0022  |
| 5 | 1 | 5 | 4 | 4 | 1 | 4 | 3 | 11977.5796 | -0.0052 |
| 5 | 1 | 5 | 6 | 4 | 1 | 4 | 5 | 11977.7677 | 0.0045  |
| 5 | 1 | 5 | 7 | 4 | 1 | 4 | 6 | 11977.9829 | -0.0050 |
| 5 | 0 | 5 | 6 | 4 | 0 | 4 | 5 | 12261.9975 | -0.0078 |
| 5 | 0 | 5 | 5 | 4 | 0 | 4 | 4 | 12262.9628 | -0.0031 |
| 5 | 0 | 5 | 7 | 4 | 0 | 4 | 6 | 12264.6572 | 0.0017  |
| 5 | 0 | 5 | 4 | 4 | 0 | 4 | 3 | 12265.5893 | 0.0039  |
| 5 | 2 | 4 | 4 | 4 | 2 | 3 | 3 | 12499.6051 | 0.0001  |
| 5 | 2 | 4 | 7 | 4 | 2 | 3 | 6 | 12499.7451 | -0.0010 |
| 5 | 2 | 4 | 6 | 4 | 2 | 3 | 5 | 12501.0033 | 0.0042  |
| 5 | 3 | 3 | 7 | 4 | 3 | 2 | 6 | 12572.2556 | -0.0021 |
| 5 | 3 | 3 | 6 | 4 | 3 | 2 | 5 | 12576.6255 | -0.0006 |
| 5 | 3 | 2 | 4 | 4 | 3 | 1 | 3 | 12584.6891 | -0.0027 |
| 5 | 3 | 2 | 7 | 4 | 3 | 1 | 6 | 12586.1365 | 0.0033  |
| 5 | 3 | 2 | 5 | 4 | 3 | 1 | 4 | 12589.3207 | 0.0026  |
| 5 | 3 | 2 | 6 | 4 | 3 | 1 | 5 | 12590.7437 | -0.0035 |
| 5 | 2 | 3 | 6 | 4 | 2 | 2 | 6 | 12782.2364 | 0.0068  |
| 5 | 1 | 4 | 4 | 4 | 1 | 3 | 4 | 12944.2576 | 0.0015  |
| 5 | 1 | 4 | 7 | 4 | 1 | 3 | 6 | 12962.1102 | 0.0016  |
| 5 | 1 | 4 | 5 | 4 | 1 | 3 | 4 | 12963.0573 | 0.0032  |
| 5 | 1 | 4 | 4 | 4 | 1 | 3 | 3 | 12963.5712 | -0.0029 |
| 6 | 1 | 6 | 6 | 5 | 1 | 5 | 6 | 14343.6347 | 0.0029  |
| 6 | 0 | 6 | 7 | 5 | 0 | 5 | 6 | 14596.9046 | 0.0016  |
| 6 | 0 | 6 | 6 | 5 | 0 | 5 | 5 | 14597.5348 | -0.0001 |
| 6 | 0 | 6 | 8 | 5 | 0 | 5 | 7 | 14599.4915 | -0.0010 |
| 6 | 0 | 6 | 5 | 5 | 0 | 5 | 4 | 14600.1151 | -0.0021 |
| 6 | 3 | 3 | 5 | 5 | 3 | 2 | 4 | 15133.4923 | 0.0006  |
| 6 | 3 | 3 | 8 | 5 | 3 | 2 | 7 | 15134.1055 | 0.0002  |
| 6 | 3 | 3 | 6 | 5 | 3 | 2 | 5 | 15136.5892 | -0.0034 |
| 6 | 1 | 5 | 7 | 5 | 1 | 4 | 6 | 15502.5877 | -0.0056 |
| 6 | 1 | 5 | 5 | 5 | 1 | 4 | 4 | 15504.7396 | -0.0026 |
| 6 | 1 | 5 | 7 | 5 | 1 | 4 | 7 | 15521.3974 | 0.0039  |
| 7 | 1 | 6 | 8 | 6 | 1 | 5 | 7 | 18009.7802 | -0.0008 |
| 7 | 1 | 6 | 7 | 6 | 1 | 5 | 6 | 18010.7052 | 0.0006  |
| 7 | 1 | 6 | 9 | 6 | 1 | 5 | 8 | 18011.2789 | 0.0008  |
| 7 | 1 | 6 | 6 | 6 | 1 | 5 | 5 | 18012.0770 | 0.0006  |

**Observed Transition Frequencies for CH<sup>37</sup>ClF<sub>2</sub>-H<sup>12</sup>C<sup>12</sup>CH**

| <u>J'</u> | <u>K<sub>a</sub>'</u> | <u>K<sub>c</sub>'</u> | <u>F' + 1/2</u> | <u>J''</u> | <u>K<sub>a</sub>''</u> | <u>K<sub>c</sub>''</u> | <u>F'' + 1/2</u> | <u>Frequency (MHz)</u> | <u>Obs. - Calc. (MHz)</u> |
|-----------|-----------------------|-----------------------|-----------------|------------|------------------------|------------------------|------------------|------------------------|---------------------------|
| 3         | 1                     | 3                     | 2               | 2          | 1                      | 2                      | 1                | 7150.9879              | 0.0050                    |
| 3         | 1                     | 3                     | 5               | 2          | 1                      | 2                      | 4                | 7153.3386              | -0.0019                   |
| 3         | 1                     | 3                     | 4               | 2          | 1                      | 2                      | 3                | 7154.7081              | -0.0034                   |
| 3         | 0                     | 3                     | 4               | 2          | 0                      | 2                      | 3                | 7408.8689              | 0.0042                    |
| 3         | 0                     | 3                     | 5               | 2          | 0                      | 2                      | 4                | 7410.5003              | 0.0000                    |
| 3         | 0                     | 3                     | 3               | 2          | 0                      | 2                      | 2                | 7411.0397              | 0.0021                    |
| 3         | 0                     | 3                     | 2               | 2          | 0                      | 2                      | 1                | 7412.6017              | -0.0002                   |
| 3         | 2                     | 1                     | 2               | 2          | 2                      | 0                      | 1                | 7529.5209              | -0.0013                   |
| 3         | 2                     | 1                     | 5               | 2          | 2                      | 0                      | 4                | 7534.8511              | -0.0081                   |
| 3         | 2                     | 1                     | 3               | 2          | 2                      | 0                      | 2                | 7537.9184              | -0.0061                   |
| 3         | 2                     | 1                     | 4               | 2          | 2                      | 0                      | 3                | 7543.2577              | -0.0080                   |
| 3         | 1                     | 2                     | 5               | 2          | 1                      | 1                      | 4                | 7773.2831              | -0.0050                   |
| 3         | 1                     | 2                     | 4               | 2          | 1                      | 1                      | 3                | 7774.6250              | 0.0008                    |
| 3         | 1                     | 2                     | 2               | 2          | 1                      | 1                      | 1                | 7776.0538              | 0.0030                    |
| 3         | 1                     | 2                     | 3               | 2          | 1                      | 1                      | 2                | 7777.3948              | 0.0009                    |
| 4         | 1                     | 4                     | 3               | 3          | 1                      | 3                      | 2                | 9519.9775              | -0.0040                   |
| 4         | 1                     | 4                     | 4               | 3          | 1                      | 3                      | 3                | 9520.2038              | -0.0012                   |
| 4         | 1                     | 4                     | 6               | 3          | 1                      | 3                      | 5                | 9520.7083              | 0.0016                    |
| 4         | 1                     | 4                     | 5               | 3          | 1                      | 3                      | 4                | 9520.9225              | 0.0011                    |
| 4         | 0                     | 4                     | 4               | 3          | 0                      | 3                      | 3                | 9809.0750              | -0.0017                   |
| 4         | 0                     | 4                     | 6               | 3          | 0                      | 3                      | 5                | 9809.8696              | 0.0016                    |
| 4         | 0                     | 4                     | 3               | 3          | 0                      | 3                      | 2                | 9811.1444              | 0.0067                    |
| 4         | 2                     | 3                     | 3               | 3          | 2                      | 2                      | 2                | 9949.7947              | -0.0054                   |
| 4         | 2                     | 3                     | 6               | 3          | 2                      | 2                      | 5                | 9950.5656              | 0.0029                    |
| 4         | 2                     | 3                     | 4               | 3          | 2                      | 2                      | 3                | 9952.1822              | 0.0019                    |
| 4         | 2                     | 3                     | 5               | 3          | 2                      | 2                      | 4                | 9953.1048              | 0.0072                    |
| 4         | 2                     | 2                     | 3               | 3          | 2                      | 1                      | 2                | 10104.8327             | 0.0053                    |
| 4         | 2                     | 2                     | 6               | 3          | 2                      | 1                      | 5                | 10106.0819             | 0.0043                    |
| 4         | 2                     | 2                     | 4               | 3          | 2                      | 1                      | 3                | 10109.2831             | 0.0035                    |
| 4         | 2                     | 2                     | 5               | 3          | 2                      | 1                      | 4                | 10110.5288             | 0.0019                    |
| 4         | 1                     | 3                     | 6               | 3          | 1                      | 2                      | 5                | 10344.2537             | -0.0016                   |
| 4         | 1                     | 3                     | 5               | 3          | 1                      | 2                      | 4                | 10344.3409             | -0.0023                   |
| 4         | 1                     | 3                     | 3               | 3          | 1                      | 2                      | 2                | 10345.9717             | 0.0093                    |
| 4         | 1                     | 3                     | 4               | 3          | 1                      | 2                      | 3                | 10346.0542             | -0.0032                   |
| 5         | 1                     | 5                     | 5               | 4          | 1                      | 4                      | 4                | 11874.7677             | -0.0003                   |
| 5         | 1                     | 5                     | 4               | 4          | 1                      | 4                      | 3                | 11874.9628             | -0.0040                   |
| 5         | 1                     | 5                     | 6               | 4          | 1                      | 4                      | 5                | 11875.0730             | -0.0001                   |
| 5         | 1                     | 5                     | 7               | 4          | 1                      | 4                      | 6                | 11875.2790             | 0.0012                    |
| 5         | 0                     | 5                     | 6               | 4          | 0                      | 4                      | 5                | 12157.4230             | 0.0008                    |
| 5         | 0                     | 5                     | 5               | 4          | 0                      | 4                      | 4                | 12158.1792             | 0.0003                    |
| 5         | 0                     | 5                     | 7               | 4          | 0                      | 4                      | 6                | 12159.5835             | -0.0026                   |
| 5         | 0                     | 5                     | 4               | 4          | 0                      | 4                      | 3                | 12160.3251             | -0.0022                   |
| 5         | 2                     | 3                     | 4               | 4          | 2                      | 2                      | 3                | 12714.5780             | -0.0015                   |
| 5         | 2                     | 3                     | 7               | 4          | 2                      | 2                      | 6                | 12714.9757             | -0.0014                   |
| 5         | 2                     | 3                     | 5               | 4          | 2                      | 2                      | 4                | 12717.6954             | -0.0023                   |
| 5         | 2                     | 3                     | 6               | 4          | 2                      | 2                      | 5                | 12718.0842             | 0.0049                    |
| 5         | 1                     | 4                     | 6               | 4          | 1                      | 3                      | 5                | 12893.9629             | 0.0036                    |
| 5         | 1                     | 4                     | 7               | 4          | 1                      | 3                      | 6                | 12894.4397             | -0.0056                   |
| 5         | 1                     | 4                     | 5               | 4          | 1                      | 3                      | 4                | 12895.1337             | -0.0032                   |

|   |   |   |   |   |   |   |   |            |         |
|---|---|---|---|---|---|---|---|------------|---------|
| 5 | 1 | 4 | 4 | 4 | 1 | 3 | 3 | 12895.6079 | -0.0015 |
| 6 | 0 | 6 | 7 | 5 | 0 | 5 | 6 | 14463.4458 | 0.0050  |
| 6 | 0 | 6 | 6 | 5 | 0 | 5 | 5 | 14463.9269 | -0.0018 |
| 6 | 0 | 6 | 8 | 5 | 0 | 5 | 7 | 14465.5113 | -0.0011 |

**Observed Transition Frequencies for CH<sup>35</sup>ClF<sub>2</sub>-H<sup>13</sup>C<sup>13</sup>CH**

| <u>J'</u> | <u>K<sub>a</sub>'</u> | <u>K<sub>c</sub>'</u> | <u>F' + 1/2</u> | <u>J''</u> | <u>K<sub>a</sub>''</u> | <u>K<sub>c</sub>''</u> | <u>F'' + 1/2</u> | <u>Frequency (MHz)</u> | <u>Obs. - Calc. (MHz)</u> |
|-----------|-----------------------|-----------------------|-----------------|------------|------------------------|------------------------|------------------|------------------------|---------------------------|
| 3         | 1                     | 3                     | 2               | 2          | 1                      | 2                      | 1                | 6896.9781              | 0.0009                    |
| 3         | 1                     | 3                     | 3               | 2          | 1                      | 2                      | 2                | 6898.7863              | 0.0042                    |
| 3         | 1                     | 3                     | 5               | 2          | 1                      | 2                      | 4                | 6900.0058              | -0.0007                   |
| 3         | 1                     | 3                     | 4               | 2          | 1                      | 2                      | 3                | 6901.8108              | 0.0000                    |
| 3         | 0                     | 3                     | 4               | 2          | 0                      | 2                      | 3                | 7134.2694              | 0.0014                    |
| 3         | 0                     | 3                     | 5               | 2          | 0                      | 2                      | 4                | 7136.0228              | 0.0018                    |
| 3         | 0                     | 3                     | 3               | 2          | 0                      | 2                      | 2                | 7136.9338              | 0.0020                    |
| 3         | 0                     | 3                     | 2               | 2          | 0                      | 2                      | 1                | 7138.6412              | -0.0004                   |
| 3         | 2                     | 2                     | 2               | 2          | 2                      | 1                      | 1                | 7174.4067              | 0.0000                    |
| 3         | 2                     | 2                     | 5               | 2          | 2                      | 1                      | 4                | 7180.5034              | -0.0055                   |
| 3         | 2                     | 2                     | 3               | 2          | 2                      | 1                      | 2                | 7182.9252              | 0.0007                    |
| 3         | 2                     | 2                     | 4               | 2          | 2                      | 1                      | 3                | 7189.2096              | -0.0004                   |
| 3         | 2                     | 1                     | 2               | 2          | 2                      | 0                      | 1                | 7221.5979              | 0.0043                    |
| 3         | 2                     | 1                     | 5               | 2          | 2                      | 0                      | 4                | 7228.2862              | -0.0026                   |
| 3         | 2                     | 1                     | 3               | 2          | 2                      | 0                      | 2                | 7231.9658              | -0.0013                   |
| 3         | 2                     | 1                     | 4               | 2          | 2                      | 0                      | 3                | 7238.6730              | 0.0018                    |
| 3         | 1                     | 2                     | 5               | 2          | 1                      | 1                      | 4                | 7450.8394              | -0.0072                   |
| 3         | 1                     | 2                     | 4               | 2          | 1                      | 1                      | 3                | 7452.6210              | -0.0014                   |
| 3         | 1                     | 2                     | 2               | 2          | 1                      | 1                      | 1                | 7454.3224              | -0.0001                   |
| 3         | 1                     | 2                     | 3               | 2          | 1                      | 1                      | 2                | 7456.1082              | -0.0020                   |
| 4         | 1                     | 4                     | 3               | 3          | 1                      | 3                      | 2                | 9186.1165              | -0.0019                   |
| 4         | 1                     | 4                     | 4               | 3          | 1                      | 3                      | 3                | 9186.4867              | -0.0016                   |
| 4         | 1                     | 4                     | 6               | 3          | 1                      | 3                      | 5                | 9187.0667              | -0.0017                   |
| 4         | 1                     | 4                     | 5               | 3          | 1                      | 3                      | 4                | 9187.4195              | -0.0014                   |
| 4         | 0                     | 4                     | 5               | 3          | 0                      | 3                      | 4                | 9458.5087              | 0.0017                    |
| 4         | 0                     | 4                     | 4               | 3          | 0                      | 3                      | 3                | 9459.8886              | -0.0020                   |
| 4         | 0                     | 4                     | 6               | 3          | 0                      | 3                      | 5                | 9460.6194              | -0.0011                   |
| 4         | 0                     | 4                     | 3               | 3          | 0                      | 3                      | 2                | 9462.1826              | -0.0012                   |
| 4         | 2                     | 3                     | 6               | 3          | 2                      | 2                      | 5                | 9566.5506              | 0.0013                    |
| 4         | 2                     | 3                     | 4               | 3          | 2                      | 2                      | 3                | 9568.6365              | 0.0010                    |
| 4         | 2                     | 3                     | 5               | 3          | 2                      | 2                      | 4                | 9569.7098              | 0.0014                    |
| 4         | 2                     | 2                     | 3               | 3          | 2                      | 1                      | 2                | 9682.7194              | -0.0003                   |
| 4         | 2                     | 2                     | 6               | 3          | 2                      | 1                      | 5                | 9684.2822              | 0.0001                    |
| 4         | 2                     | 2                     | 4               | 3          | 2                      | 1                      | 3                | 9688.1059              | 0.0012                    |
| 4         | 2                     | 2                     | 5               | 3          | 2                      | 1                      | 4                | 9689.6452              | -0.0012                   |
| 4         | 1                     | 3                     | 6               | 3          | 1                      | 2                      | 5                | 9920.0134              | 0.0024                    |
| 4         | 1                     | 3                     | 5               | 3          | 1                      | 2                      | 4                | 9920.2553              | 0.0030                    |
| 4         | 1                     | 3                     | 3               | 3          | 1                      | 2                      | 2                | 9922.1477              | 0.0034                    |
| 4         | 1                     | 3                     | 4               | 3          | 1                      | 2                      | 3                | 9922.3997              | 0.0035                    |
| 5         | 1                     | 5                     | 5               | 4          | 1                      | 4                      | 4                | 11463.4495             | -0.0009                   |
| 5         | 1                     | 5                     | 4               | 4          | 1                      | 4                      | 3                | 11463.6128             | -0.0013                   |
| 5         | 1                     | 5                     | 6               | 4          | 1                      | 4                      | 5                | 11463.8528             | -0.0005                   |
| 5         | 1                     | 5                     | 7               | 4          | 1                      | 4                      | 6                | 11464.0273             | 0.0010                    |
| 5         | 0                     | 5                     | 6               | 4          | 0                      | 4                      | 5                | 11742.4571             | 0.0027                    |
| 5         | 0                     | 5                     | 5               | 4          | 0                      | 4                      | 4                | 11743.4058             | -0.0044                   |
| 5         | 0                     | 5                     | 7               | 4          | 0                      | 4                      | 6                | 11744.9467             | 0.0004                    |
| 5         | 0                     | 5                     | 4               | 4          | 0                      | 4                      | 3                | 11745.8429             | 0.0051                    |
| 5         | 1                     | 4                     | 6               | 4          | 1                      | 3                      | 5                | 12373.4362             | -0.0020                   |
| 5         | 1                     | 4                     | 7               | 4          | 1                      | 3                      | 6                | 12373.8654             | 0.0001                    |

|   |   |   |   |   |   |   |   |            |         |
|---|---|---|---|---|---|---|---|------------|---------|
| 5 | 1 | 4 | 5 | 4 | 1 | 3 | 4 | 12374.8971 | 0.0017  |
| 5 | 1 | 4 | 4 | 4 | 1 | 3 | 3 | 12375.3044 | -0.0049 |
| 6 | 1 | 6 | 6 | 5 | 1 | 5 | 5 | 13729.4553 | -0.0024 |
| 6 | 1 | 6 | 7 | 5 | 1 | 5 | 6 | 13729.6681 | 0.0014  |
| 6 | 1 | 6 | 5 | 5 | 1 | 5 | 4 | 13729.8663 | -0.0016 |
| 6 | 1 | 6 | 8 | 5 | 1 | 5 | 7 | 13730.0893 | 0.0047  |
| 6 | 0 | 6 | 7 | 5 | 0 | 5 | 6 | 13987.8285 | -0.0040 |
| 6 | 0 | 6 | 6 | 5 | 0 | 5 | 5 | 13988.4757 | 0.0021  |
| 6 | 0 | 6 | 8 | 5 | 0 | 5 | 7 | 13990.3284 | 0.0000  |

**Observed Transition Frequencies for CH<sup>37</sup>ClF<sub>2</sub>-H<sup>13</sup>C<sup>13</sup>CH**

| <u>J'</u> | <u>K<sub>a</sub>'</u> | <u>K<sub>c</sub>'</u> | <u>F' + 1/2</u> | <u>J''</u> | <u>K<sub>a</sub>''</u> | <u>K<sub>c</sub>''</u> | <u>F'' + 1/2</u> | <u>Frequency (MHz)</u> | <u>Obs. - Calc. (MHz)</u> |
|-----------|-----------------------|-----------------------|-----------------|------------|------------------------|------------------------|------------------|------------------------|---------------------------|
| 3         | 1                     | 3                     | 2               | 2          | 1                      | 2                      | 1                | 6840.8213              | -0.0025                   |
| 3         | 1                     | 3                     | 3               | 2          | 1                      | 2                      | 2                | 6842.2286              | 0.0046                    |
| 3         | 1                     | 3                     | 5               | 2          | 1                      | 2                      | 4                | 6843.2047              | 0.0031                    |
| 3         | 1                     | 3                     | 4               | 2          | 1                      | 2                      | 3                | 6844.6010              | 0.0046                    |
| 3         | 0                     | 3                     | 4               | 2          | 0                      | 2                      | 3                | 7083.4834              | 0.0019                    |
| 3         | 0                     | 3                     | 5               | 2          | 0                      | 2                      | 4                | 7084.9517              | 0.0017                    |
| 3         | 0                     | 3                     | 3               | 2          | 0                      | 2                      | 2                | 7085.5972              | -0.0018                   |
| 3         | 0                     | 3                     | 2               | 2          | 0                      | 2                      | 1                | 7087.0350              | 0.0013                    |
| 3         | 1                     | 2                     | 5               | 2          | 1                      | 1                      | 4                | 7414.4874              | -0.0044                   |
| 3         | 1                     | 2                     | 4               | 2          | 1                      | 1                      | 3                | 7415.8560              | -0.0041                   |
| 4         | 1                     | 4                     | 3               | 3          | 1                      | 3                      | 2                | 9109.2080              | -0.0075                   |
| 4         | 1                     | 4                     | 4               | 3          | 1                      | 3                      | 3                | 9109.4818              | 0.0054                    |
| 4         | 1                     | 4                     | 6               | 3          | 1                      | 3                      | 5                | 9109.9554              | 0.0029                    |
| 4         | 1                     | 4                     | 5               | 3          | 1                      | 3                      | 4                | 9110.2079              | 0.0017                    |
| 4         | 0                     | 4                     | 5               | 3          | 0                      | 3                      | 4                | 9385.2842              | 0.0005                    |
| 4         | 0                     | 4                     | 4               | 3          | 0                      | 3                      | 3                | 9386.3979              | 0.0007                    |
| 4         | 0                     | 4                     | 6               | 3          | 0                      | 3                      | 5                | 9387.0650              | 0.0035                    |
| 4         | 0                     | 4                     | 3               | 3          | 0                      | 3                      | 2                | 9388.2800              | -0.0045                   |
| 4         | 1                     | 3                     | 5               | 3          | 1                      | 2                      | 4                | 9869.6891              | -0.0023                   |
| 4         | 1                     | 3                     | 4               | 3          | 1                      | 2                      | 3                | 9871.3813              | -0.0064                   |
| 5         | 1                     | 5                     | 5               | 4          | 1                      | 4                      | 4                | 11365.2835             | 0.0033                    |
| 5         | 1                     | 5                     | 4               | 4          | 1                      | 4                      | 3                | 11365.4344             | -0.0032                   |
| 5         | 1                     | 5                     | 6               | 4          | 1                      | 4                      | 5                | 11365.5871             | -0.0072                   |
| 5         | 1                     | 5                     | 7               | 4          | 1                      | 4                      | 6                | 11365.7566             | -0.0006                   |
| 5         | 0                     | 5                     | 6               | 4          | 0                      | 4                      | 5                | 11643.7855             | -0.0013                   |
| 5         | 0                     | 5                     | 5               | 4          | 0                      | 4                      | 4                | 11644.5392             | 0.0002                    |
| 5         | 0                     | 5                     | 7               | 4          | 0                      | 4                      | 6                | 11645.8281             | 0.0011                    |
| 5         | 0                     | 5                     | 4               | 4          | 0                      | 4                      | 3                | 11646.5459             | -0.0021                   |
| 5         | 1                     | 4                     | 6               | 4          | 1                      | 3                      | 5                | 12307.1913             | 0.0024                    |
| 5         | 1                     | 4                     | 7               | 4          | 1                      | 3                      | 6                | 12307.5850             | 0.0050                    |
| 5         | 1                     | 4                     | 5               | 4          | 1                      | 3                      | 4                | 12308.3439             | -0.0015                   |
| 5         | 1                     | 4                     | 4               | 4          | 1                      | 3                      | 3                | 12308.7335             | 0.0060                    |

**Principal axis coordinates (Å) from an Inertial Fit of  $I_a$  and  $I_b$  from all four isotopologues**

|    | a      | b      | c      |
|----|--------|--------|--------|
| Cl | 0.730  | 1.293  | 0.000  |
| C  | 0.635  | -0.446 | 0.000  |
| H  | -0.413 | -0.780 | 0.000  |
| F  | 1.234  | -0.950 | -1.095 |
| F  | 1.234  | -0.950 | 1.095  |
| C  | -2.796 | 0.427  | 0.000  |
| H  | -2.330 | 1.380  | 0.000  |
| H  | -3.790 | -1.607 | 0.000  |
| C  | -3.324 | -0.654 | 0.000  |

**Principal axis coordinates (Å) from ab initio structure C**

|    | a      | b      | c      |
|----|--------|--------|--------|
| Cl | 0.790  | 1.303  | 0.000  |
| C  | 0.585  | -0.461 | 0.000  |
| H  | -0.470 | -0.694 | 0.000  |
| F  | 1.178  | -0.982 | 1.088  |
| F  | 1.178  | -0.982 | -1.088 |
| C  | -2.819 | 0.490  | 0.000  |
| H  | -2.433 | 1.479  | 0.000  |
| H  | -3.642 | -1.629 | 0.000  |
| C  | -3.248 | -0.644 | 0.000  |
